# Supplementary material
Source: PubMed Central journal article supplement (PMC3521592)

## SUPPLEMENTAL FIGURE LEGEND

**Figure S.1. Analytical ultracentrifugation sedimentation equilibrium of the p300<sub>CH1</sub>/viral oncoprotein complexes.** A. Analytical ultracentrifugation sedimentation equilibrium curves and residuals of the p300<sub>CH1</sub>/Ad5-E1A<sub>1-77</sub> complex. The experiment was performed using three protein complex concentrations and three speeds, as indicated. All of the data was fit globally to a single species model, as well as to a 1:1 binding model:  $A + B \rightleftharpoons AB$ . B. Analytical ultracentrifugation sedimentation equilibrium curves and residuals of the p300<sub>CH1</sub>/HPV16-E7<sub>1-51</sub> complex. The experiment was performed using three protein complex concentrations and three speeds, as indicated. All of the data was fit globally to a single species model, as well as to a 1:1 stoichiometry binding model:  $A + B \rightleftharpoons AB$ .

Figure S.1A

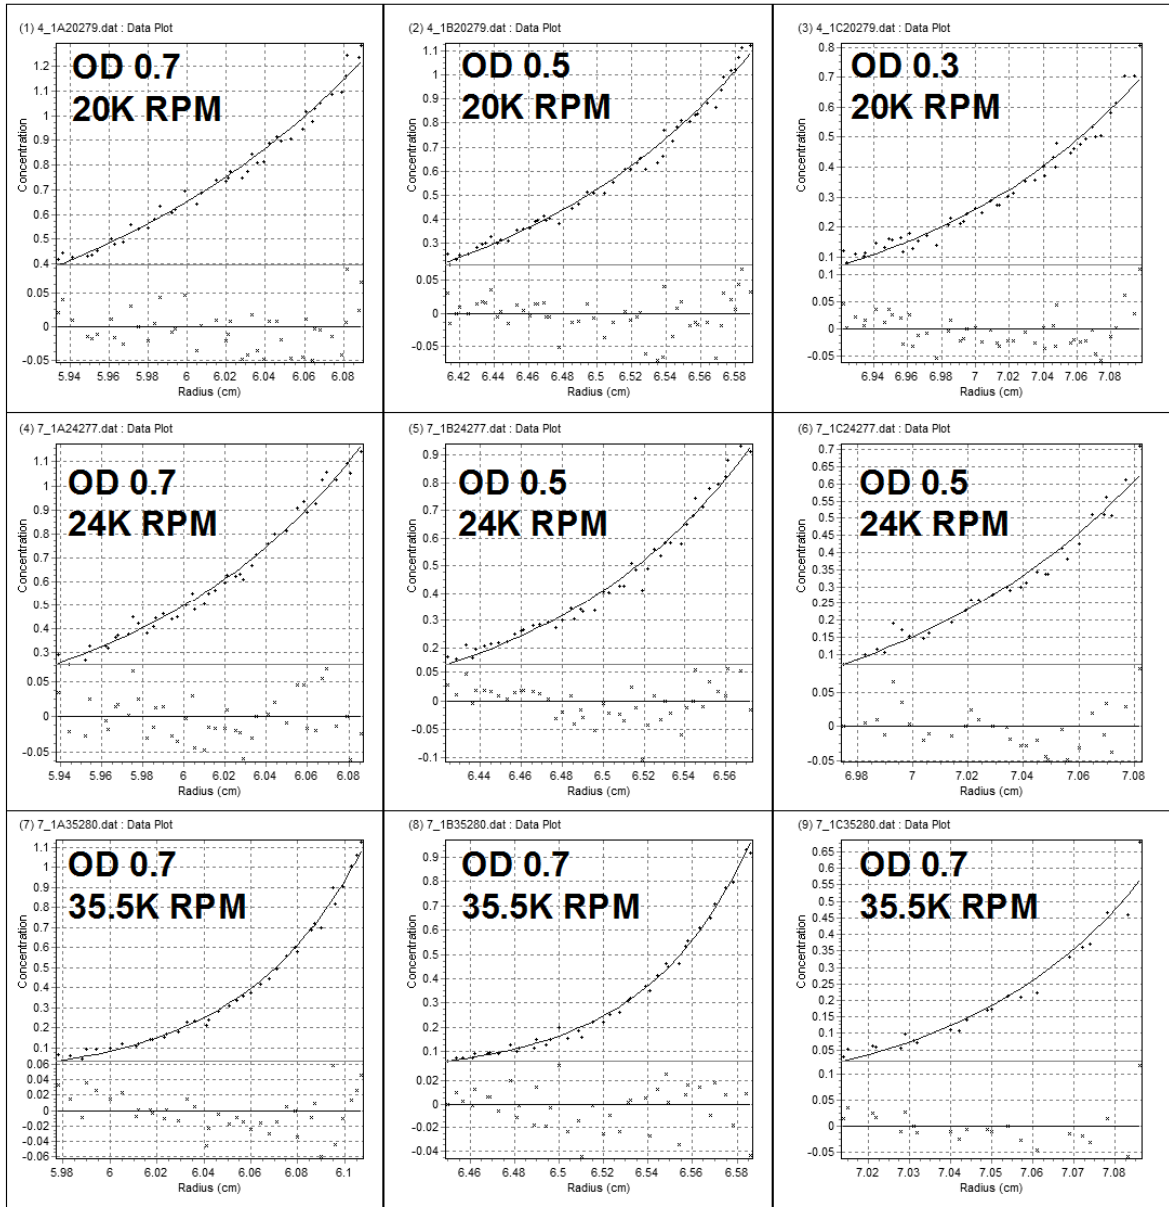

Figure S.1B

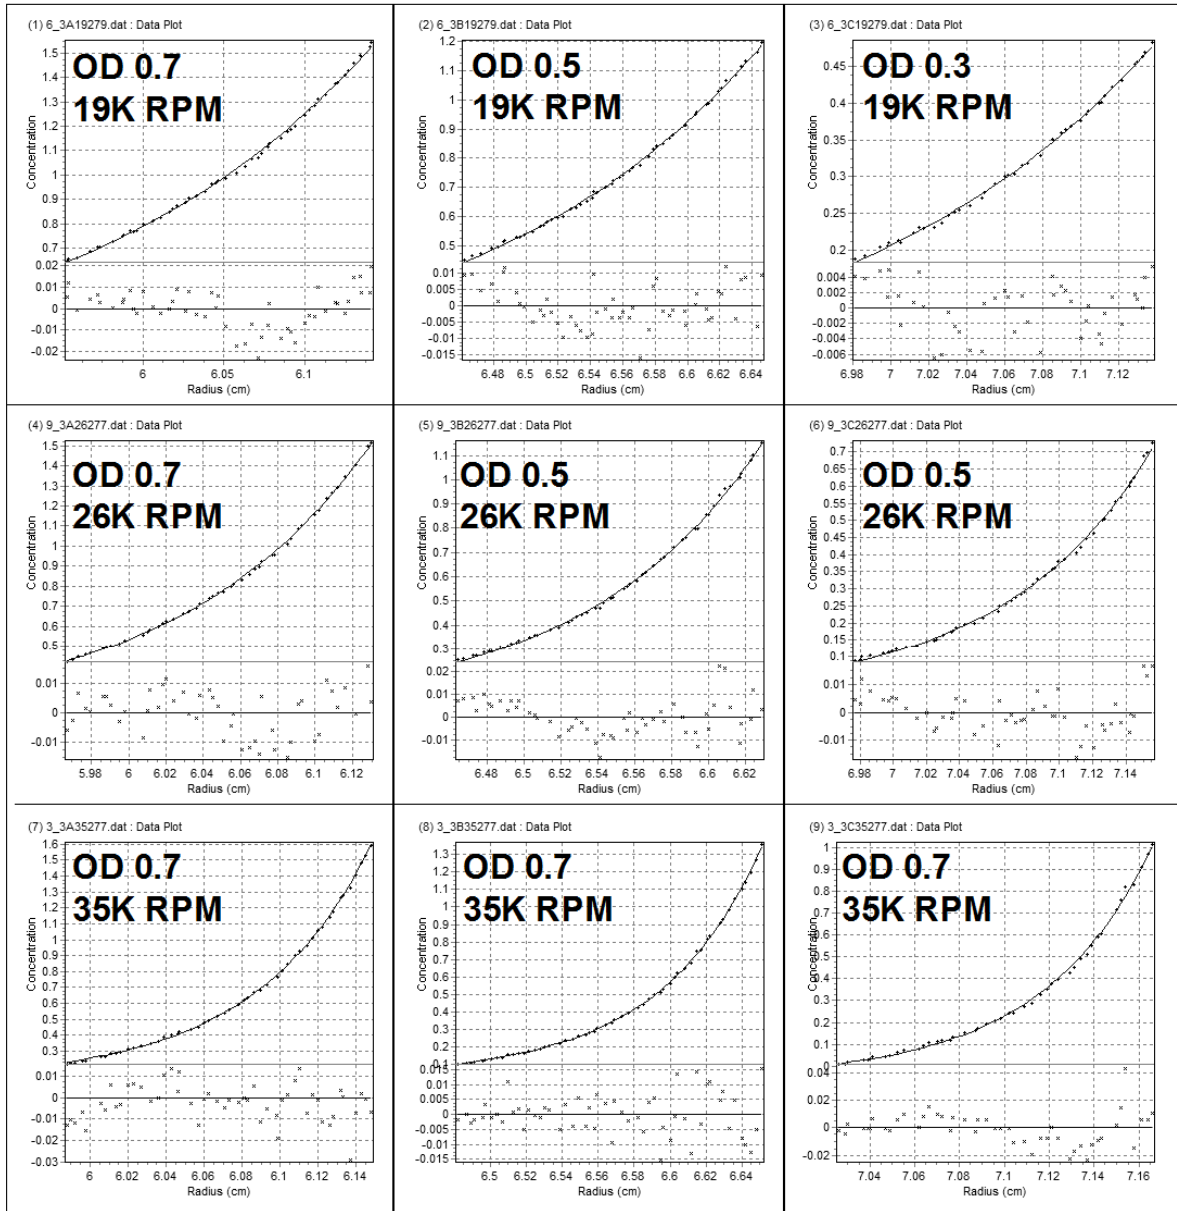

Supplement: NIHMS421060-supplement-1_si_001.pdf [file NIHMS421060-supplement-1_si_001.pdf]
